# Supplementary material for: Cocrystals assembled by pyrene and 1,2- or 1,4-diiodotetrafluorobenzenes and their phosphorescent behaviors modulated by local molecular environment
Source: Royal Society of Chemistry journal article supplement (doi:10.1039/c1ce06069d), 2011-11-24
Supplement: c1ce06069d.pdf [file c1ce06069d.pdf]

# Cocrystals assembled by pyrene and 1,2- or 1,4-diiodotetrafluorobenzenes and their phosphorescent behaviors modulated by local molecular environment

Qian Jin Shen, Hong Qing Wei, Wen Sheng Zou, Hao-Ling Sun\*, Wei Jun Jin\*

College of Chemistry, Beijing Normal University, Beijing 100875, P. R. China

Email: [wjjin@bnu.edu.cn](mailto:wjjin@bnu.edu.cn) (W. J. Jin) and [haolingsun@bnu.edu.cn](mailto:haolingsun@bnu.edu.cn) (H. L. Sun);

Fax: +86 58802146; Tel: +86 58802146

## Supporting Information

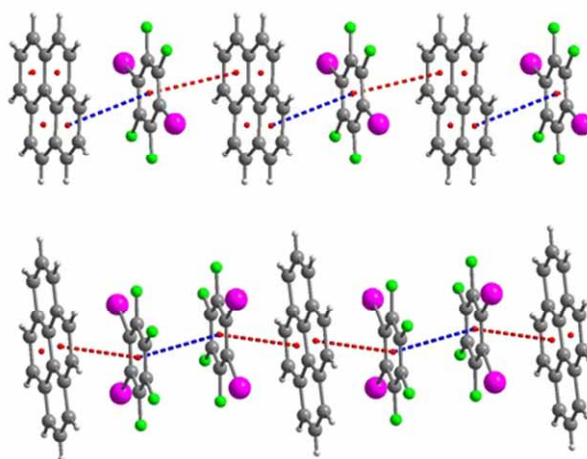

**Fig. S1** The  $\pi$ - $\pi$  stacking arrangements of cocrystal **1** (top) and **2** (bottom).

**Table S1** The details of C-H...F-C contacts in **1** and **2**.

| Crystals | No. | C-H      | A                        | $d_{(\text{H}\cdots\text{F})}$ , Å | $\theta_{\text{C-H}\cdots\text{F}}$ , ° |
|----------|-----|----------|--------------------------|------------------------------------|-----------------------------------------|
| <b>1</b> | 1   | C1-H1    | F3 [-x+2, -y+1, -z+1]    | 2.862                              | 146.8                                   |
|          | 2   | C13-H13  | F3 [-x+2, -y+1, -z+1]    | 2.697                              | 152.7                                   |
|          | 3   | C6-H6    | F4 [x-1, -y+1.5, z-0.5]  | 2.875                              | 151.1                                   |
|          | 4   | C8-H8    | F4 [x-1, -y+1.5, z-0.5]  | 2.826                              | 152.4                                   |
|          | 5   | C11-H11  | F2 [-x+1, -y+1, -z]      | 2.567                              | 144.6                                   |
|          | 6   | C9-H9    | F2 [-x+1, -y+1, -z]      | 2.845                              | 137.0                                   |
| <b>2</b> | 1   | C13H13A  | F4 [-x+1 y-0.5, -z+0.5]  | 2.872                              | 152.3                                   |
|          | 2   | C13-H13A | F3 [-x+1 y-0.5, -z+0.5]  | 2.729                              | 144.1                                   |
|          | 3   | C7-H7A   | F2 [-x+1, y-1.5, -z+0.5] | 2.602                              | 153.2                                   |

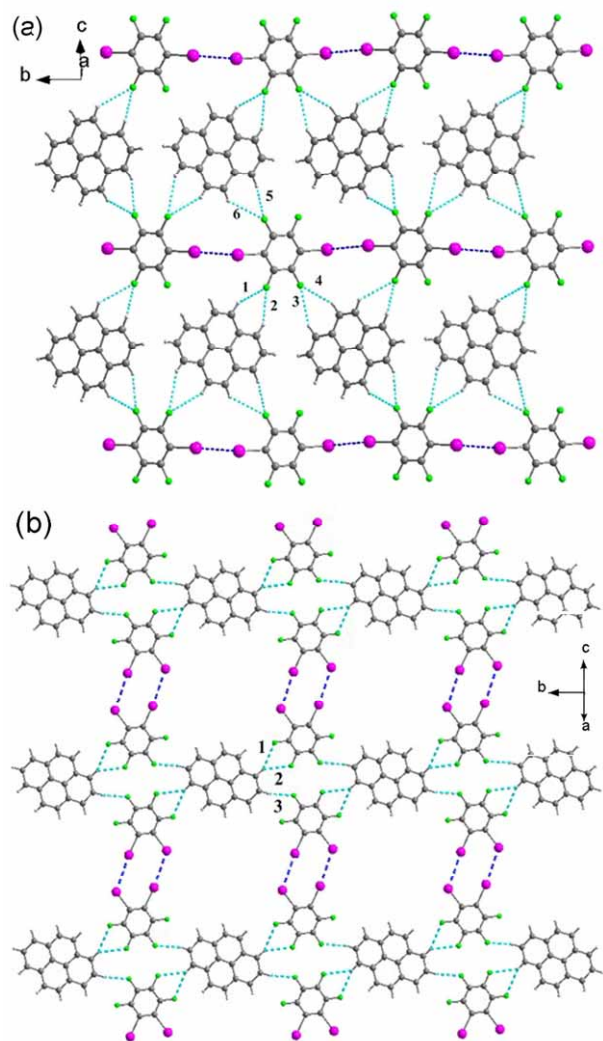

**Fig. S2** Diagram of C-H...F-C contacts and C-I...I-C interactions of **1** (a) and **2** (b).

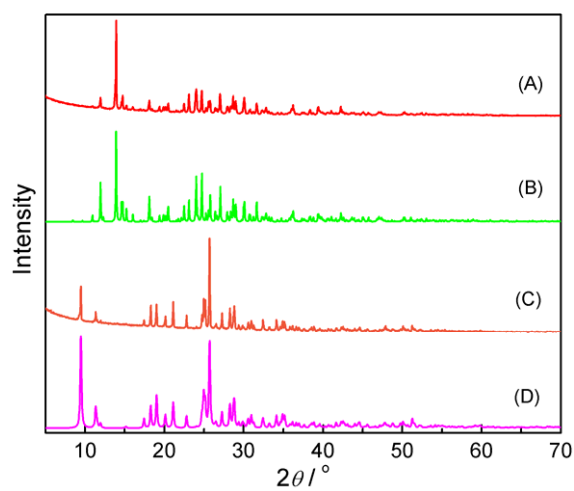

**Fig. S3** The whole XRPD patterns (5-70°) of cocrystal **1** and **2**. (A), (B): experimental and simulated patterns of **1**, (C), (D): experimental and simulated patterns of **2**.

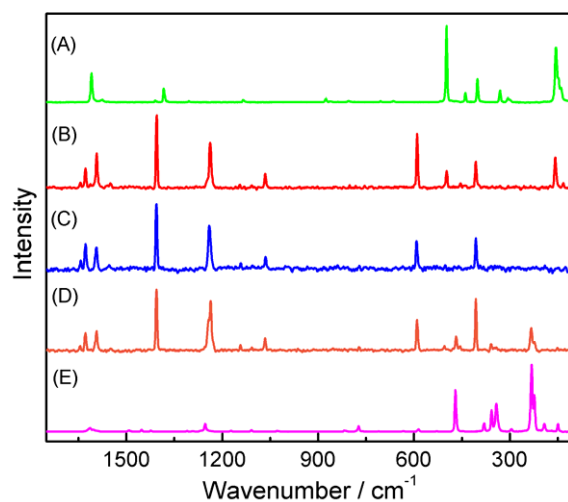

**Fig. S4** Raman spectra of monomers and cocrystals. (A): pure 1,4-DITFB; (B): cocrystal **1**; (C): pure pyrene; (D): cocrystal **2**; (E): pure 1,2-DITFB.

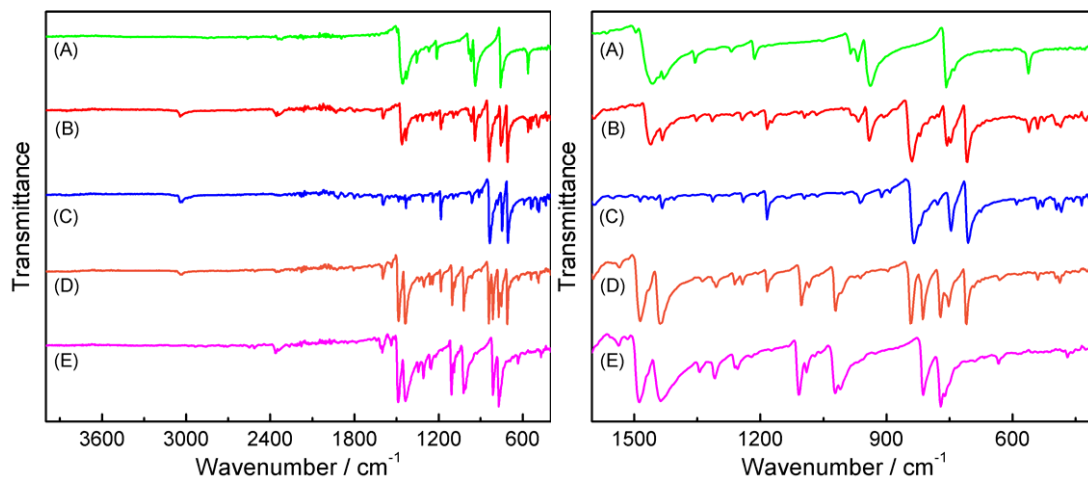

**Fig. S5** ATR IR spectra of monomers and cocrystals in the whole range (4000-400 cm<sup>-1</sup>, left) and selected range (1600-400 cm<sup>-1</sup>, right). (A): pure 1,4-DITFB; (B): cocrystal **1**; (C): pure pyrene; (D): cocrystal **2**; (E): pure 1,2-DITFB.
